# Supplementary material for: Swallowed topical steroid therapy for eosinophilic oesophagitis in children: practical, evidence-based guidance by the BSPGHAN Eosinophilic Oesophagitis Working Group
Source: PubMed Central journal article supplement (PMC11116858; doi:10.1136/bmjpo-2023-002467), 2024-05-23
Supplement: bmjpo-2023-002467supp002.pdf [file bmjpo-2023-002467supp002.pdf]

### Appendix 1: How to prepare and use oral viscous budesonide

In order to dispense the drug in a viscous solution, many different budesonide preparations have been used in local protocols for use in children and practice varies widely<sup>[21]</sup>. The pharmacokinetic profile of these carrier substances has not been published.

Trials have been completed into a proprietary budesonide oral solution but results have not yet been published and currently no licensed solution is currently available in UK<sup>[22]</sup>.

In the UK there are two strengths of budesonide nebule available that can be mixed into a viscous liquid or slurry; 500microgram in 2ml and 1mg in 2ml. The contents of one nebule is mixed with the adjunct immediately before a dose. Adjuncts commonly used in the UK are given below with currently used dosing.

A summary of international practice states that between 5-15ml of liquid of any sort e.g. apple sauce or honey or any other are used to mix with the budesonide nebuliser solution<sup>[21]</sup>.

| Adjunct                                                          | Dose – Weight / volume                                   | Dose – Standard household measure / scoops                                                                                                                     | Potential side effects and ingredients                                                                                                                                                                                                                     |
|------------------------------------------------------------------|----------------------------------------------------------|----------------------------------------------------------------------------------------------------------------------------------------------------------------|------------------------------------------------------------------------------------------------------------------------------------------------------------------------------------------------------------------------------------------------------------|
| Splenda Low Calorie Sweetener (also available as Splenda Stevia) | 5g Splenda (sucralose) per 0.5mg (2ml) budesonide nebule | 10 teaspoons (or 3.3 culinary tablespoons of 15ml) or 1 x Nutricia® 50 ml blue scoop.<br><br>Half the dose of Splenda can be used for a more viscous solution. | Sucralose or Stevia<br><br>May become contaminated with milk/soya during preparation<br><br>Potential long-term negative effects described on gut microbiome; cardiovascular risk; diabetes and cancer risk however evidence is limited <sup>[23-25]</sup> |
| Simple Syrup                                                     | 10ml simple syrup per 0.5mg(2ml) budesonide nebule       | 2 teaspoons                                                                                                                                                    | Sucrose in water                                                                                                                                                                                                                                           |
| Simple Linctus                                                   | 10ml Simple Linctus per 0.5mg (2ml) budesonide nebule    | 2 teaspoons                                                                                                                                                    | Contains citric acid monohydrate, glycerol, aniseed flavour, maltitol liquid (contains sorbitol), sodium benzoate and purified water.                                                                                                                      |
| Budesonide dispersible tablet                                    | N/A                                                      | N/A                                                                                                                                                            | Not licenced for under 18 years of age.<br><br>However evidence of effectiveness in adolescents <sup>[26]</sup>                                                                                                                                            |

Alternative adjuncts reported in international literature:

|             |                                                                                            |                      |                                                                                                                                                                                              |
|-------------|--------------------------------------------------------------------------------------------|----------------------|----------------------------------------------------------------------------------------------------------------------------------------------------------------------------------------------|
| Apple sauce | 5 g per 0.5mg (2ml) budesonide nebule                                                      | 1 teaspoon           | Allergic reactions to apple and other ingredients of the sauce <sup>[21]</sup>                                                                                                               |
| Honey       | 5 g per 0.5mg (2ml) budesonide nebule                                                      | 1 teaspoon           | Not to be used in infants under 12 months of age due to botulism risk.<br><br>Theoretically could contain allergenic substances however allergic reactions to honey are rare <sup>[21]</sup> |
| Xanthan gum | 50mg xanthan gum (0.05g) plus 5ml cooled boiled or sterile water per 2ml nebule budesonide | Needs to be measured | Not reported <sup>[21]</sup>                                                                                                                                                                 |
